# Supplementary figures and images for: A common mechanism underlies changes of mind about decisions and confidence
Source: eLife journal article supplement (doi:10.7554/elife.12192), 2016-02-01

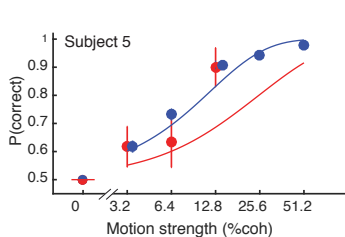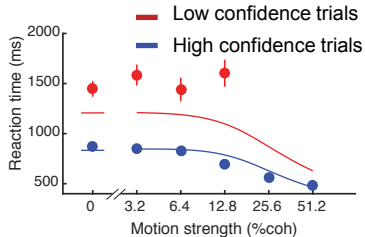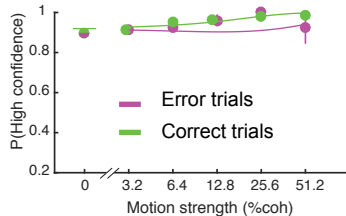

Figure 2—figure supplement 1

Supplement: supp [file elife_poa_e12192_Figure_2_figure_supplement_1.pdf › elife_poa_e12192_Figure_2_figure_supplement_1.pdf]

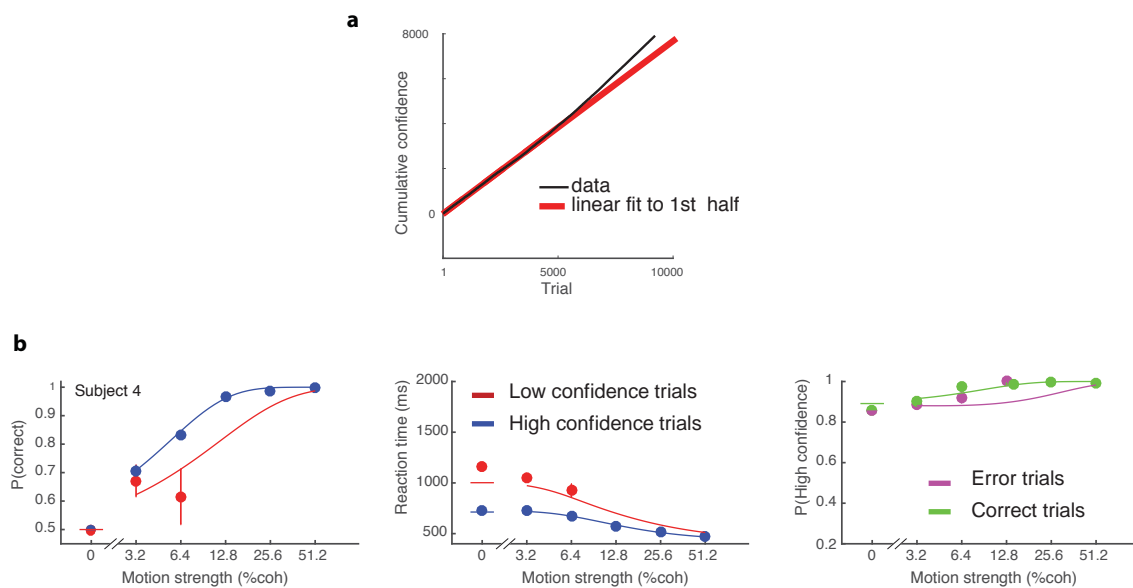

Figure 2–figure supplement 2

Supplement: supp [file elife_poa_e12192_Figure_2_figure_supplement_2.pdf › elife_poa_e12192_Figure_2_figure_supplement_2.pdf]

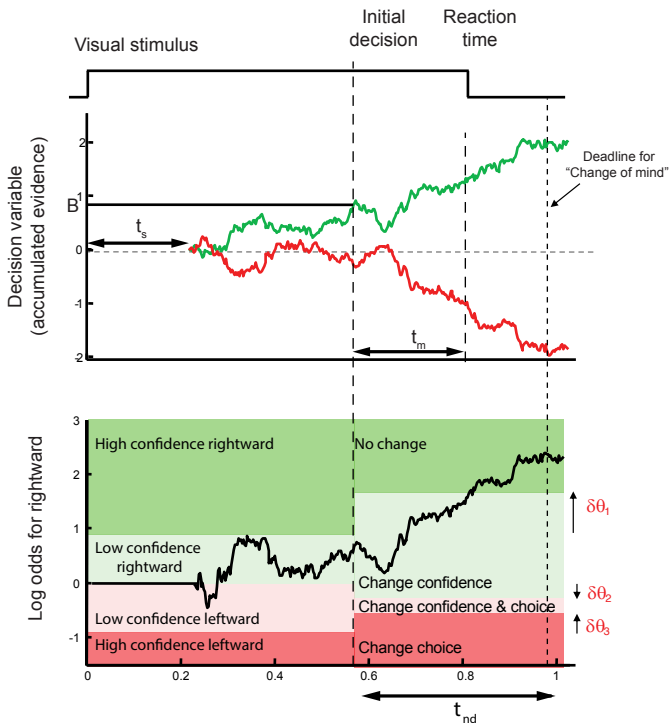

Figure 3—figure supplement 1

Supplement: supp [file elife_poa_e12192_Figure_3_figure_supplement_1.pdf › elife_poa_e12192_Figure_3_figure_supplement_1.pdf]

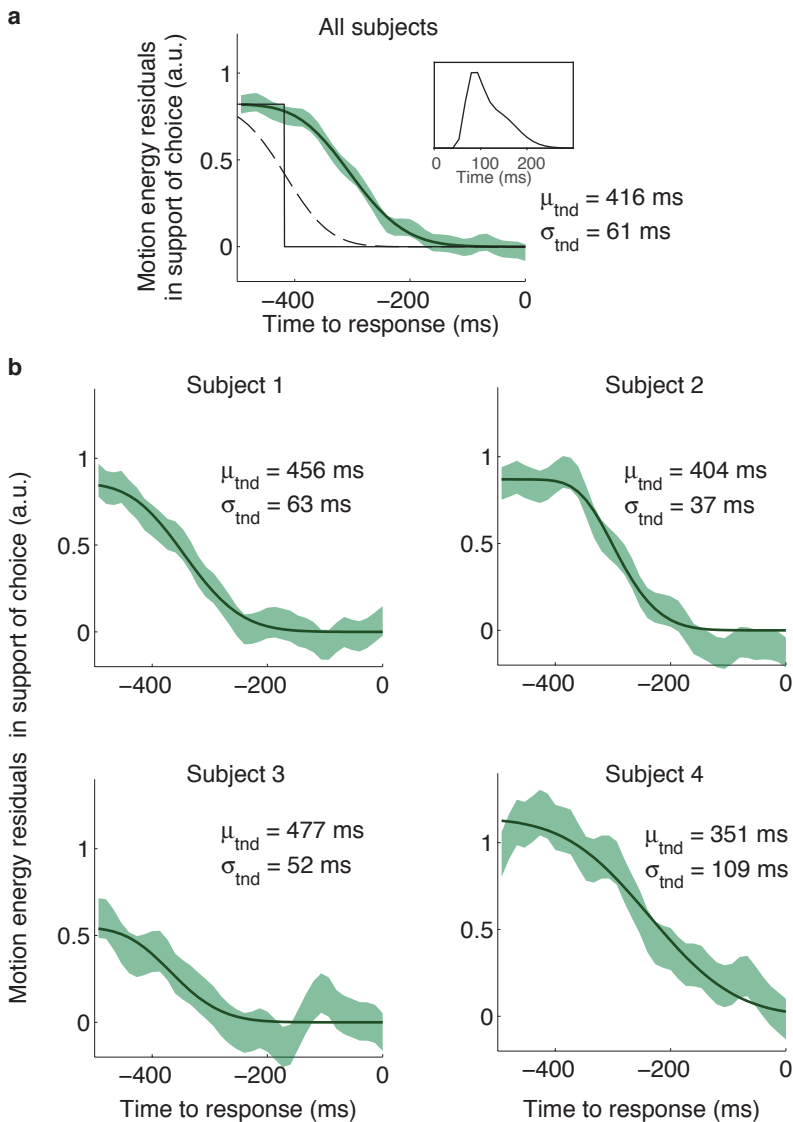

Figure 4—figure supplement 1

Supplement: supp [file elife_poa_e12192_Figure_4_figure_supplement_1.pdf › elife_poa_e12192_Figure_4_figure_supplement_1.pdf]

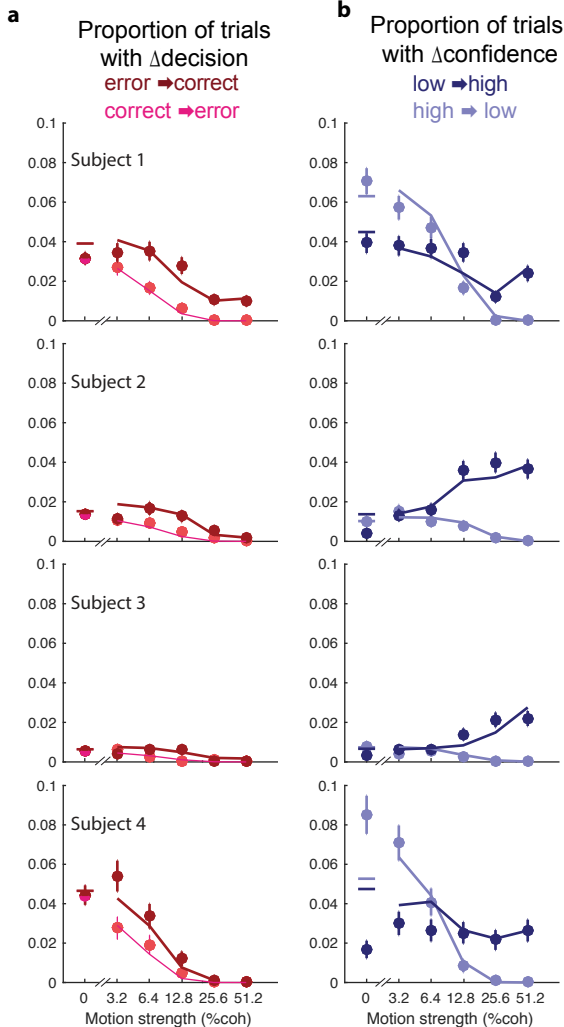

Figure 5-figure supplement 1

Supplement: supp [file elife_poa_e12192_Figure_5_figure_supplement_1.pdf › elife_poa_e12192_Figure_5_figure_supplement_1.pdf]
